# Supplementary material for: Construction of a flexible 1D core–shell Al2O3@NaNbO3 nanowire/poly(p-phenylene benzobisoxazole) nanocomposite with stable and enhanced dielectric properties in an ultra-wide temperature range
Source: Royal Society of Chemistry journal article supplement (doi:10.1039/d1tc05139c), 2021-12-08
Supplement: d1tc05139c1.pdf [file d1tc05139c1.pdf]

## Supporting Information

**Construction of flexible 1D core-shell Al<sub>2</sub>O<sub>3</sub>@NaNbO<sub>3</sub> nanowires/poly-(*p*-phenylene benzobisoxazole) nanocomposite with stable and enhanced dielectric properties in an ultra-wide temperature range**

Li Jinpeng,<sup>a</sup> Jiang Junhao,<sup>a</sup> Cheng Qilin,<sup>\*a</sup> Cui Zhongkai,<sup>b</sup> Liu Xiaoyun,<sup>\*a</sup> Zuo Peiyuan,<sup>a</sup> Zhuang Qixin,<sup>\*a</sup>

<sup>a</sup> Key Laboratory of Advanced Polymer Materials of Shanghai, School of Material Science and Engineering, East China University of Science and Technology, Shanghai 200237, P.R. China

<sup>b</sup>Southern Medical University, Guangzhou, Guangdong Province 510515, P. R. China

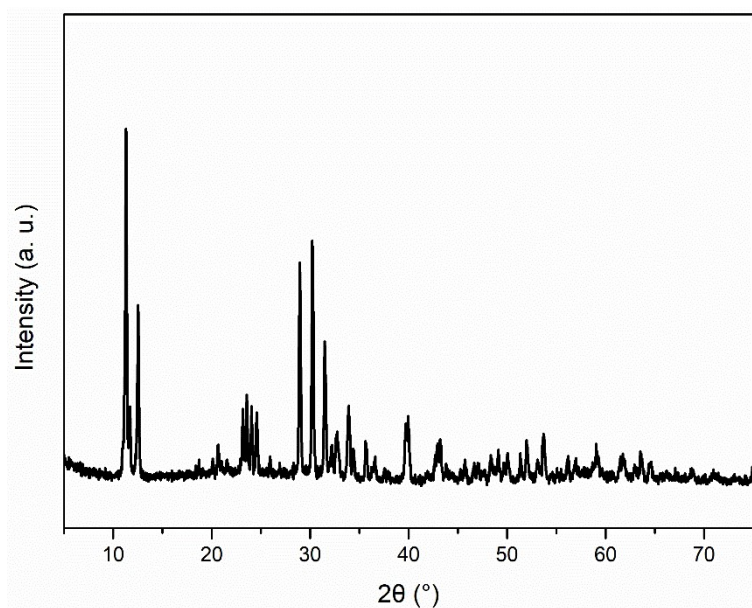

**Fig. S1** XRD pattern of  $\text{Na}_2\text{Nb}_2\text{O}_6 \cdot 2/3\text{H}_2\text{O}$

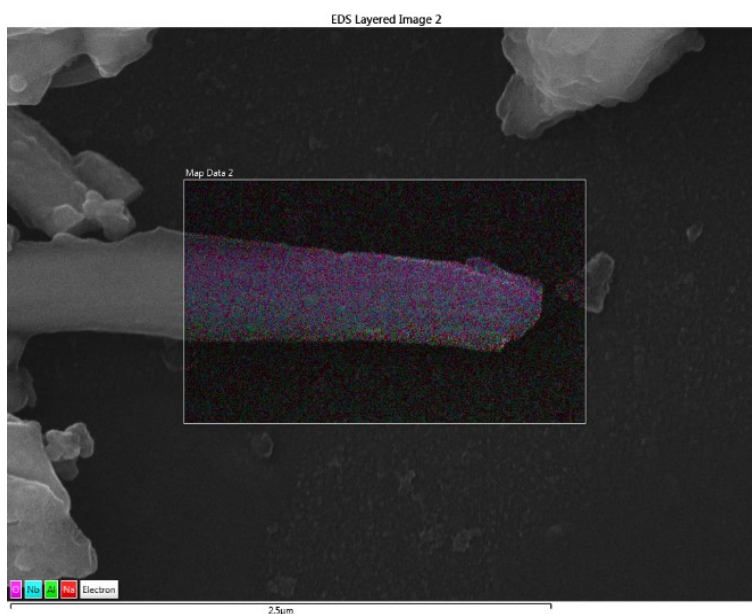

**Fig. S2** EDS image of  $\text{Al}_2\text{O}_3 @ \text{NaNbO}_3$

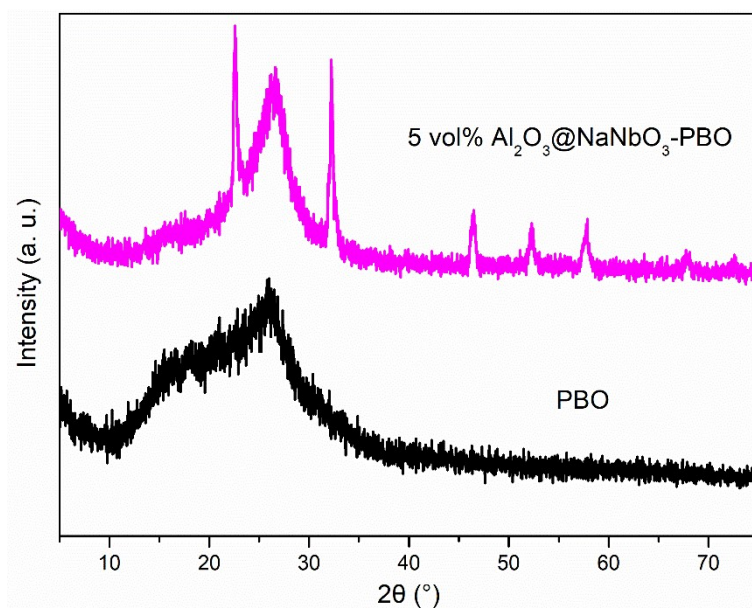

**Fig. S3 XRD patterns of PBO and 5 vol%  $\text{Al}_2\text{O}_3@\text{NaNbO}_3\text{-PBO}$**

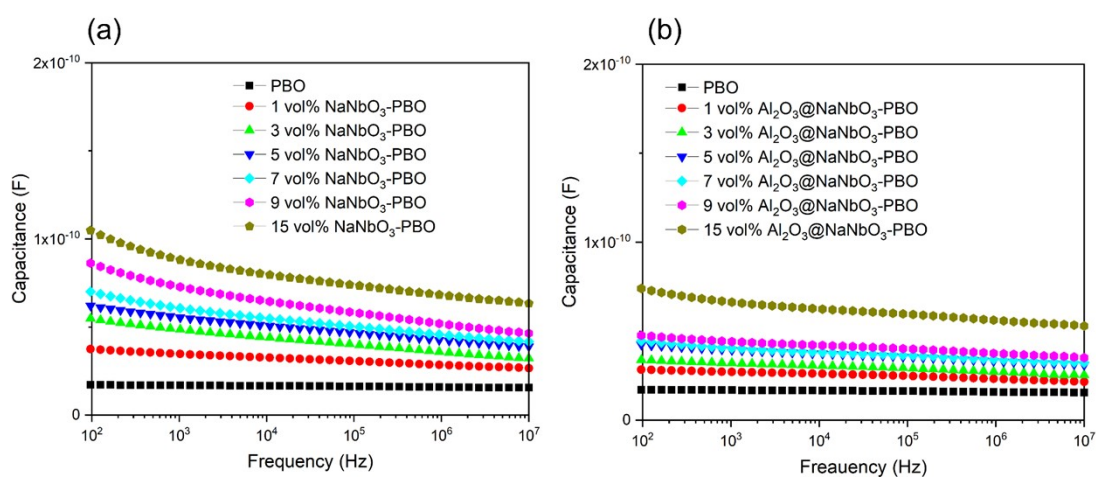

**Fig. S4 The frequency dependent capacitance of  $\text{NaNbO}_3\text{-PBO}$  (a) and  $\text{Al}_2\text{O}_3@\text{NaNbO}_3\text{-PBO}$  (b)**

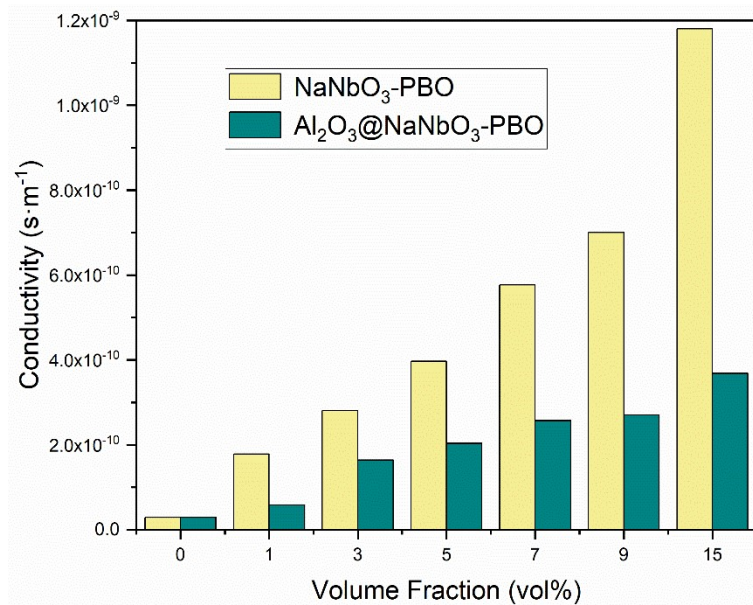

**Fig. S5** Conductivities of NaNbO<sub>3</sub>-PBO and Al<sub>2</sub>O<sub>3</sub>@NaNbO<sub>3</sub>-PBO at 1K Hz with various contents of fillers

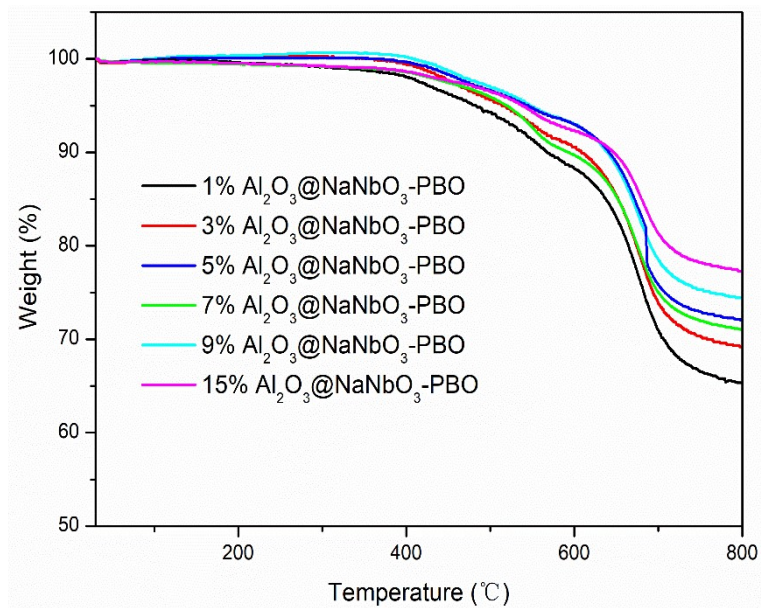

**Fig. S6** TGA curves of Al<sub>2</sub>O<sub>3</sub>@NaNbO<sub>3</sub>-PBO with different filler contents

**Table S1 The dielectric properties of the prepared composite and some related polymeric dielectrics reported in previous literatures**

| Materials                                                                     | Dielectric Constant | Dielectric Loss | Testing Temperature<br>e(°C) | Breakdown Strength<br>(kV/mm) | Ref       |
|-------------------------------------------------------------------------------|---------------------|-----------------|------------------------------|-------------------------------|-----------|
| 12 wt% Fe <sub>3</sub> O <sub>4</sub> @C@PANI/PBO                             | 164                 | 0.047           | 25                           | 195                           | S1        |
| 1.5 wt% RGO-P(o-HPMMA)/P(2-IBO)                                               | 8.35                | 0.11            | 25                           | --                            | S2        |
| 2 wt% GNs-HAP/PBO                                                             | 66.27               | 0.045           | 200                          | 130                           | S3        |
| 4 wt% GO-NH <sub>2</sub> /PI                                                  | 37                  | 0.008           | 25                           | 135                           | S4        |
| 20 wt% PANI@RGO/PI                                                            | 25.84               | 0.11            | 25                           | --                            | S5        |
| 20 vol% BT-HCuPc/PES                                                          | 9.8                 | 0.044           | 25                           | 290                           | S6        |
| 5 wt% BT@PI/PVDF                                                              | 15                  | 0.046           | 25                           | 180                           | S7        |
| 10 vol% Bi <sub>2</sub> Te <sub>3</sub> @Al <sub>2</sub> O <sub>3</sub> /PVDF | 140                 | 0.05            | 25                           | --                            | S8        |
| 7.5 vol% 2D Al <sub>2</sub> O <sub>3</sub> /c-BCB                             | 3.5                 | 0.002           | 150                          | 489                           | S9        |
| 1.4 vol% HPSi-d-Ti <sub>3</sub> C <sub>2</sub> T <sub>x</sub> /PDMS           | 15                  | 0.11            | 25                           | --                            | S10       |
| 3 vol% 1D Al <sub>2</sub> O <sub>3</sub> @NaNbO <sub>3</sub> /PBO             | 5.94                | 0.036           | 250                          | 286                           | This work |

## Reference

- 1 Q. Liu, Z. Cheng, J. Qian, X. Chen, Y. Zhang and Q. Zhuang, *J. Mater. Chem. A*, 2019, **7**, 11195-11204.
- 2 Y. Chen, S. Zhang, X. Liu, Q. Pei, J. Qian, Q. Zhuang and Z. Han, *Macromolecules*, 2015, **48**, 365-372.
- 3 H. Feng, W. Ma, Z.-K. Cui, X. Liu, J. Gu, S. Lin and Q. Zhuang, *J. Mater. Chem. A*, 2017, **5**, 8705-8713.
- 4 X. Fang, X. Liu, Z.-K. Cui, J. Qian, J. Pan, X. Li and Q. Zhuang, *J. Mater. Chem. A*, 2015, **3**, 10005-10012.
- 5 H. Feng, X. Fang, X. Liu, Q. Pei, Z.-K. Cui, S. Deng, J. Gu and Q. Zhuang, *Compos. Pt. A-Appl. Sci. Manuf.*, 2018, **109**, 578-584.
- 6 W. Xu, G. Yang, L. Jin, J. Liu, Y. Zhang, Z. Zhang and Z. Jiang, *ACS Appl. Mater. Interfaces*, 2018, **10**, 11233-11241.
- 7 X. Xie, C. Yang, X.-d. Qi, J.-h. Yang, Z.-w. Zhou and Y. Wang, *Chem. Eng. J.*, 2019, **366**, 378-389.
- 8 J. Chen, X. Wang, X. Yu, L. Yao, Z. Duan, Y. Fan, Y. Jiang, Y. Zhou and Z. Pan, *J. Mater. Chem. C*, 2018, **6**, 271-279.
- 9 H. Li, D. Ai, L. Ren, B. Yao, Z. Han, Z. Shen, J. Wang, L. Q. Chen and Q.

- Wang, *Adv. Mater.*, 2019, **31**, e1900875.
- 10 L. Wei, J. W. Wang, X. H. Gao, H. Q. Wang, X. Z. Wang and H. Ren, *ACS Appl. Mater. Interfaces*, 2020, **12**, 16805-16814.
